# Supplementary material for: The Combination of Functional Metagenomics and an Oil-Fed Enrichment Strategy Revealed the Phylogenetic Diversity of Lipolytic Bacteria Overlooked by the Cultivation-Based Method
Source: PubMed Central journal article supplement (PMC4103521; doi:10.1264/jsme2.me14002), 2014-05-23
Supplement: 29_154_s1.pdf [file 29_154_s1.pdf]

1 **Supplemental information**

2 **Materials and Methods**

3 *Bacterial 16S rRNA gene clone library*

4 DNA extraction from NS and OS samples were performed by using FastDNA SPIN Kit for  
5 Soil (MP Biomedicals) according to manufacturer's instruction. The bacterial 16S rRNA gene  
6 was amplified with the primers EUB338mix (2) and Univ1492r (3) according to a previously  
7 described method (5). PCR amplicons were purified with a QIAquick PCR Purification Kit  
8 (Qiagen, Valencia, CA) and subcloned into a pT7Blue-2 T-vector (Novagen, Madison, WI) by  
9 using a DNA Ligation kit (TaKaRa Bio, Otsu, Japan) according to the manufacturer's  
10 instructions. More than 100 clones were randomly retrieved from each library. Cloned genes  
11 were partially sequenced (ca. 400-500 bp) with a BigDye Terminator v3.1 Cycle Sequencing  
12 Kit (Applied Biosystems, Foster City, CA) and a 3130xl Genetic Analyzer (Applied  
13 Biosystems). Partial-length sequences were aligned and inserted into the tree using the  
14 parsimony tool of the ARB program (4). Phylogenetic assignment of each phylotype was  
15 determined by BLAST program provided by the National Center for Biotechnology  
16 Information (6). The phylotype was defined as a group of cloned sequences with >97.0%  
17 nucleotide sequence identity for the bacterial 16S rRNA gene. The Chao1 nonparametric  
18 species richness estimator was used for the evaluation of  $\alpha$ -diversity of NS and OS  
19 microcosms (1).

20

21 **Figure legends**

22 **Fig. S1.** Unrooted distance matrix tree of lipolytic enzymes obtained from non-enriched soil  
23 (NS) and oil-enriched soil (OS) metagenomic libraries. The phylogenetic tree was generated  
24 by maximum likelihood with MEGA 5.0 software. The classification of previously known  
25 lipolytic enzymes was based on previous studies (references nos. in the main text: 2, 8, 23, 35,  
26 39). Eight clones from OS (OSm27–34) were assembled into OSm cluster. Bar indicates 0.5  
27 change per amino acid site.

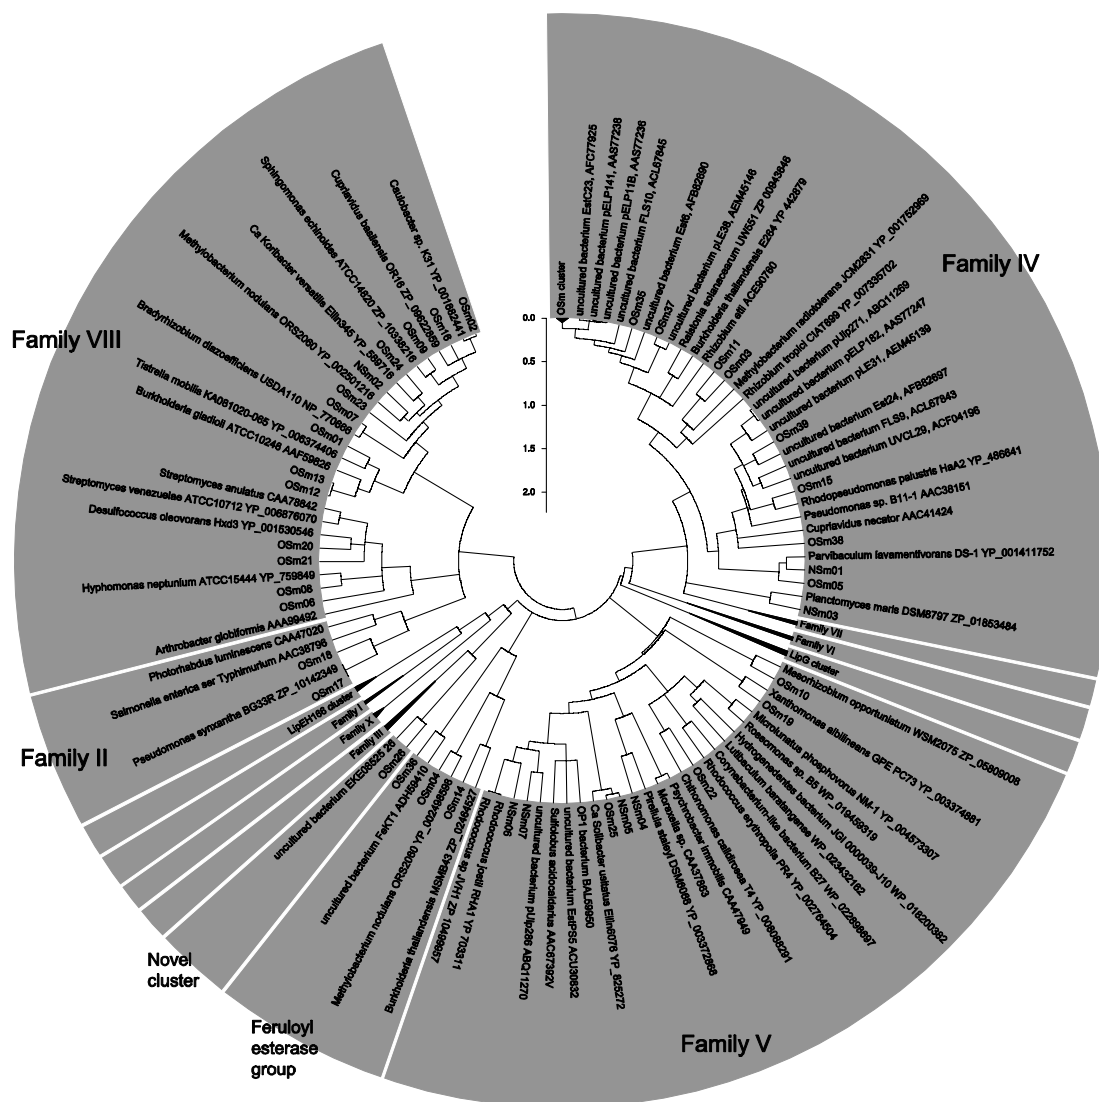

28

29

30 Table S1. Bacterial clone libraries of NS and OS microcosms

|                                        | NS                     | OS                     |
|----------------------------------------|------------------------|------------------------|
| Clone numbers                          | 144                    | 125                    |
| OTU (>97% homology)                    | 113                    | 85                     |
| Chao1 estimator                        | 799                    | 201                    |
| Phylum and class assigned <sup>a</sup> | Relative abundance (%) | Relative abundance (%) |
| <i>Proteobacteria</i>                  |                        |                        |
| <i>Alphaproteobacteria</i>             | 19.4                   | 26.4                   |
| <i>Betaproteobacteria</i>              | 7.6                    | 11.2                   |
| <i>Gammaproteobacteria</i>             | 14.6                   | 12                     |
| <i>Deltaproteobacteria</i>             | 9.0                    | 4.0                    |
| <i>Actinobacteria</i>                  | 16.0                   | 12.8                   |
| <i>Acidobacteria</i>                   | 11.1                   | 12.8                   |
| <i>Bacteroidetes</i>                   | 7.6                    | 6.4                    |
| <i>Verrucomicrobia</i>                 | 6.3                    | 2.4                    |
| <i>Planctomycetes</i>                  | 2.1                    | 3.2                    |
| <i>Chloroflexi</i>                     | 3.5                    | 0.8                    |
| <i>Nitrospirae</i>                     | 0.7                    | 0                      |
| Clone clusters                         |                        |                        |
| SPAM                                   | 0.7                    | 4.8                    |
| WS3                                    | 1.4                    | 1.6                    |
| Unidentified cluster                   | 0                      | 1.6                    |

31 <sup>a</sup> Numbers indicated relative abundances (%) for each phylogenetic group.

32

33

34 **Supplemental References**

35

36

37 1. Chao, A. 1987. Estimating the population size for capture-recapture data with unequal  
38 catchability. *Biometrics*. 43:783-791.

39 2. Daims, H., A. Bruhl, R. Amann, K.H. Schleifer, and M. Wagner. 1999. The domain-  
40 specific probe EUB338 is insufficient for the detection of all Bacteria: Development  
41 and evaluation of a more comprehensive probe set. *Systematic and Applied*  
42 *Microbiology*. 22:434-444.

43 3. Lane, D.J. 1991. 16S/23S rRNA sequencing, p. 115-175. *In* E. Stackebrandt, and M.  
44 Goodfellow (ed.), *Nucleic acid techniques in bacterial systematics*. John Wiley &  
45 Sons, Chichester, United Kingdom.

46 4. Ludwig, W., O. Strunk, R. Westram, *et al.* 2004. ARB: a software environment for  
47 sequence data. *Nucleic Acids Res.* 32:1363-1371.

48 5. Narihiro, T., T. Terada, K. Kikuchi, *et al.* 2009. Comparative analysis of bacterial and  
49 archaeal communities in methanogenic sludge granules from upflow anaerobic sludge  
50 blanket reactors treating various food-processing, high-strength organic wastewaters.  
51 *Microbes Environ.* 24:88-96.

52 6. Sayers, E.W., T. Barrett, D.A. Benson, *et al.* 2011. Database resources of the National  
53 Center for Biotechnology Information. *Nucleic Acids Res.* 39:D38-D51.

54

55
